# Supplementary material for: Soybean protein hydrolysate stimulated cholecystokinin secretion and inhibited feed intake through calcium-sensing receptors and intracellular calcium signalling in pigs
Source: Royal Society of Chemistry journal article supplement (doi:10.1039/d1fo01596f), 2021-01-01
Supplement: d1fo01596f1.pdf [file d1fo01596f1.pdf]

**Fig. S1** Cytotoxicity was detected by LDH in the presence or absence of antagonists or agonists. Relative LDH release (%) was calculated as after exposure to chemicals (at 70 min) vs. KHB (at 20 min, as 100%). Values are expressed as mean  $\pm$  SEM (n = 6~8). “\*” represents significant differences  $P < 0.05$ .

**Fig. S2** PepT1 was not involved in SPH-induced CCK release from the porcine duodenal tissues. (A–D) The mucosal tissues were perfused with KHB (0–20 min, Baseline 1), 1% SPH/Cefalexin (20–50 min), KHB + 4-AMBA (50–70 min, Baseline 2), and 1% SPH/Cefalexin + 4-AMBA (70–100 min). The perfusate was collected every 10 min to determine the CCK concentrations. Values are expressed as mean  $\pm$  SEM (n = 6~8). “\*” indicates a significant difference between the baseline and the stimulant, and “#” means a significant difference between the stimulants ( $P < 0.05$  by Tukey test).
