# Supplementary material for: Soybean protein hydrolysate stimulated cholecystokinin secretion and inhibited feed intake through calcium-sensing receptors and intracellular calcium signalling in pigs
Source: Royal Society of Chemistry journal article supplement (doi:10.1039/d1fo01596f), 2021-01-01
Supplement: d1fo01596f5.pdf [file d1fo01596f5.pdf]

**Table S1.** Dietary composition and nutrient levels (air dry basis)

| <b>Items</b>                | <b>Composition, %</b> |
|-----------------------------|-----------------------|
| Ingredients                 |                       |
| Corn                        | 59.81                 |
| Soya bean meal              | 25.80                 |
| Wheat flour                 | 5.00                  |
| Rice bran meal              | 3.00                  |
| Corn germ meal              | 3.00                  |
| L-Lysine, 98.5 %            | 0.11                  |
| DL-Methionine, 99.0 %       | 0.04                  |
| L-Threonine, 99.0 %         | 0.04                  |
| L-Tryptophan, 99.0 %        | 0.01                  |
| Calcium hydrogen phosphate  | 0.40                  |
| Limestone                   | 1.00                  |
| NaCl                        | 0.50                  |
| Acidifying agent            | 0.40                  |
| Zinc oxide                  | 0.20                  |
| Choline chloride            | 0.10                  |
| Mould inhibitor             | 0.05                  |
| Phytase                     | 0.02                  |
| Compound enzyme             | 0.02                  |
| Mineral premix <sup>a</sup> | 0.50                  |
| Nutrition level, %          |                       |
| NE <sup>b</sup> , MJ/Kg     | 10.19                 |
| Crude protein               | 18.00                 |
| Crude fat                   | 2.63                  |
| Crude fiber                 | 3.79                  |
| Crude ash                   | 5.03                  |
| Lysine                      | 1.10                  |

|            |      |
|------------|------|
| Methionine | 0.34 |
| Tryptophan | 0.21 |
| Threonine  | 0.75 |
| Valine     | 0.87 |

---

<sup>a</sup>Premix provided per kg of complete diet: 3800 IU vitamin A, 800 IU vitamin D3, 9 mg vitamin E, 1 mg vitamin K3, 1 mg vitamin B1, 2 mg vitamin B2, 1.2 mg vitamin B6, 10 µg vitamin B12, 10 mg nicotinic acid, 50 µg biotin, 0.4 mg folic acid, 80 mg iron (as FeSO4 · H2O), 5 mg copper as (CuSO4 · 5H2O), 80 mg zinc, 0.14 mg iodine (as KI), 0.25 mg Se (as Na2SeO3), 3 mg Mn (as MnSO4 · H2O);

<sup>b</sup>Analysed values except for net energy.
