# Supplementary material for: Soybean protein hydrolysate stimulated cholecystokinin secretion and inhibited feed intake through calcium-sensing receptors and intracellular calcium signalling in pigs
Source: Royal Society of Chemistry journal article supplement (doi:10.1039/d1fo01596f), 2021-01-01
Supplement: d1fo01596f6.pdf [file d1fo01596f6.pdf]

**Table S2.** Primer sequences of Real-Time PCR

| <b>Gene primers</b> | <b>Forward primer (5'-3')</b> | <b>Reverse primer (5'-3')</b> | <b>References</b> |
|---------------------|-------------------------------|-------------------------------|-------------------|
| <i>β-actin</i>      | TGCGGGACATCAAGGAGAAG          | AGTTGAAGGTGGTCTCGTGG          |                   |
| <i>GPRC6A</i>       | TGGCCCAACTGATTCGGAAA          | GGCCGGGAGAACTTCTTTGA          |                   |
| <i>mGluR4</i>       | GCCCAAGGTCTACGTCATCC          | CCTGGCTAGATCGCATGGTT          | [15]              |
| <i>TIR1</i>         | TACAACGGTCTCCTCTCGGT          | CAGCATGGCAAACACGTTGA          |                   |
| <i>TIR3</i>         | TGTACCAGGTTCTCGTCCCT          | GGCCATGAACACTAGGCTG           |                   |
| <i>CaSR</i>         | CGGGGGACTCTTTCCTATTC          | GCTGGGCTGCTGTTTATTC           | [50]              |
| <i>PepTI/SLC15A</i> | GGATAGCCCTGTACCCCAAGCT        | CATCCTCCACGTGCTTCTTGA         | [51]              |
