# Supplementary figures and images for: Soybean protein hydrolysate stimulated cholecystokinin secretion and inhibited feed intake through calcium-sensing receptors and intracellular calcium signalling in pigs
Source: Royal Society of Chemistry journal article supplement (doi:10.1039/d1fo01596f), 2021-01-01

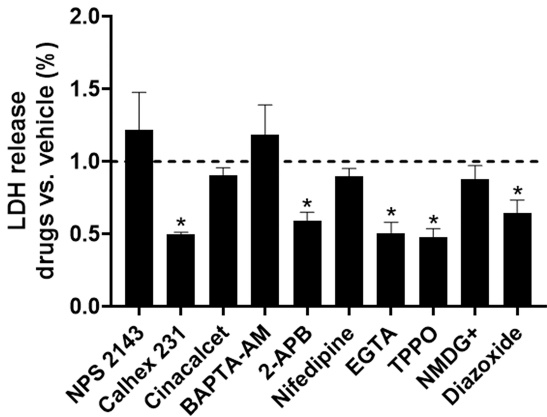

Supplement: d1fo01596f3.pdf [file d1fo01596f3.pdf]
